1 KIMGENS: A novel method to estimate kinship in organisms with  
2 mixed haploid diploid genetic systems robust to population structure

3

4 Yen-Wen Wang<sup>1,\*</sup>, Cécile Ané<sup>1,2</sup>

5

6 <sup>1</sup> Department of Botany, University of Wisconsin-Madison, Madison, WI, 53706, USA

7 <sup>2</sup> Department of Statistics, University of Wisconsin-Madison, Madison, WI, 53706, USA

8 \* Correspondence author

9

10

## 11 Abstract

### 12 Motivation:

13 Kinship estimation is necessary for evaluating violations of assumptions or testing certain  
14 hypotheses in many population genomic studies. However, kinship estimators are usually  
15 designed for diploid systems and cannot be used in populations with mixed haploid diploid  
16 genetic systems. The only estimators for different ploidies require datasets free of population  
17 structure, limiting their usage.

18

### 19 Results:

20 We present KIMGENS, an estimator for kinship estimation among individuals of various  
21 ploidies, that is robust to population structure. This estimator is based on the popular KING-  
22 robust estimator but uses diploid relatives of the individuals of interest as references of  
23 heterozygosity and extends its use to haploid-diploid and haploid pairs of individuals. We  
24 demonstrate that KIMGENS estimates kinship more accurately than previously developed  
25 estimators in simulated panmictic, structured and admixed populations, but has lower accuracy  
26 when the individual of interest is inbred. KIMGENS also outperforms other estimators in a  
27 honeybee dataset. Therefore, KIMGENS is a valuable addition to a population geneticist's  
28 toolbox.

29

### 30 Availability and Implementation:

31 KIMGENS and its association simulation tool are implemented and available open-source at  
32 <https://github.com/YenWenWang/HapDipKinship>.

33

34 Contact:

35 Yen-Wen Wang

36 Email: [ywang883@wisc.edu](mailto:ywang883@wisc.edu)

37

## 38 Introduction

39 Kinship estimation is crucial to the evaluation of assumption violations (such as when  
40 estimating population nucleotide diversity) or to testing various ecological or evolutionary  
41 hypotheses (e.g., kin selection). However, kinship estimators for whole genome datasets are  
42 mainly developed for human populations (Ramstetter *et al.*, 2017). Although these estimators  
43 have been widely used in non-human systems, their applications are restricted to diploid-only  
44 populations. Nonetheless, a large portion of life forms show plasticity in ploidy (Otto and  
45 Gerstein, 2008), which is not accounted for in these estimators. Many plants (e.g. ferns, mosses),  
46 fungi (e.g. mushrooms) and algae (e.g. sea lettuces) have complex, multistage life cycles,  
47 perform alternation of generations and form haploid structures independent of their diploid  
48 counterpart (Brown and Casselton, 2001; John, 1994). Furthermore, most Hymenopterans (e.g.  
49 bees and ants), Thysanopterans (e.g. thrips) and some other invertebrates (e.g. some spider mites  
50 and rotifers), have an arrhenotokous haplodiploidy system, where males are haploid and females  
51 are diploid (Cruickshank and Thomas, 1999; Normark, 2003). Because of the widely present  
52 mixed ploidy life-forms, it is crucial to develop estimators that can estimate kinship between  
53 individuals with different ploidy levels.

54 Two marker-based estimators have been developed specifically to estimate relatedness  
55 among individuals of different ploidy, including Huang2014, a method-of-moments (MOM)  
56 estimator, and Huang2015, a maximum likelihood (ML) estimator (Huang *et al.*, 2015). These

57 estimators can thus be used for genome sequencing data directly. In addition, some classical  
58 estimators can be extended to estimate relatedness between different ploidies. For example, two  
59 kinship estimators, Loiselle1995 and Ritland1996 (Loiselle *et al.*, 1995; Ritland, 1996), are  
60 adapted and implemented in the program PolyRelatedness to resolve inequivalent ploidy (Huang  
61 *et al.*, 2015). All estimators mentioned above are capable of using multi-allelic loci, which allow  
62 them to take advantage of a diversity of genetic markers (e.g., microsatellites). However, these  
63 estimators require allele frequencies at each locus in the population, which may not be available  
64 in some studies due to sampling strategies (Hahn, 2019). In addition, relying on allele  
65 frequencies essentially assumes a population free of stratification. Therefore, the estimators do  
66 not account for cryptic population structure, which can result in overestimating in kinship  
67 (Manichaikul *et al.*, 2010).

68         To remove the requirement of no population structure, we built on the KING-robust  
69 estimator by Manichaikul *et al.*, (2010). We extended the estimator's use to haploid-diploid pairs  
70 and named this extension exKING-robust. The exKING-robust estimator uses the heterozygosity  
71 of the individuals in the pair of interest as a diversity estimate for background identity-by-  
72 descent (IBD). Next, we developed KIMGENS (Kinship Inference for Mixed GENetic Systems),  
73 which instead uses the heterozygosity of relatives of the individuals of interest, allowing  
74 estimating kinship for diploid, haploid-diploid and haploid pairs of individuals. We showed the  
75 estimators are robust to population structure. KIMGENS also performs relatively well under  
76 admixture, but can underestimate kinship if an individual is inbred.

77

## 78 Materials and Methods

79 We aim to develop a simple kinship estimator that applies to haploid, haploid-diploid and  
80 diploid pairs of individuals and is robust to population structure. KING-robust's strategy is  
81 useful for developing a novel kinship estimator for haploid-diploid pairs of individuals. But the  
82 strategy cannot apply to haploid pairs directly because it requires the number of heterozygotic  
83 sites of an individual to estimate expected heterozygosity ( $2pq$ ) in the ancestral subpopulation of  
84 an individual.

85 To resolve this issue, we propose a two-step approach: (1) We extend KING-robust to  
86 obtain a haploid-diploid kinship analysis and to identify a set of diploid relatives for each  
87 individual; and (2) for two individuals of interest,  $i$  and  $j$ , we use their diploid relatives from step  
88 1 to estimate mean heterozygosity for this pair and to modify their kinship estimate. In the  
89 following sections we will first describe a haploid-diploid kinship estimator. Next, we will  
90 demonstrate the modification to KING-robust and haploid-diploid kinship estimators for using  
91 related individuals  $k$ . Then, we describe the haploid kinship analysis. Lastly, we will evaluate the  
92 performance of these estimators with simulations and a biological dataset (on honeybee).

93

#### 94 Kinship estimation in haploid-diploid pairs of individuals: exKING-robust

95 The kinship coefficient  $\phi_{ij}$ , originally termed correlation coefficient of two individuals  $i$   
96 and  $j$ , is defined as the probability that two randomly sampled alleles from two individuals are  
97 identical-by-descent (IBD) (Lange, 1997; Malécot, 1948). In this section, we derive an estimator  
98 for the kinship of a pair of individuals  $i_d$  and  $j_h$ , where  $i_d$  is diploid and  $j_h$  is haploid.  $\phi_{i_d j_h}$  can be  
99 calculated with:

100

101

$$\phi_{i_d j_h} = (1/2) \pi_{1i_d j_h}$$

102 (1)

103 where  $\pi_{ni_dj_h}$  denotes the probability of individuals  $i_d$  and  $j_h$  sharing  $n$  alleles being IBD. The  
104 probability of individual  $i_d$  being homozygotic and not in identical-by-state (IBS) with individual  
105  $j_h$  at a site can be calculated with:

$$\Pr(AA, a \text{ or } aa, A) = p^2q\pi_{0i_dj_h} + pq^2\pi_{0i_dj_h} = pq\pi_{0i_dj_h}$$

106  
107  
108 (2)

109 and the probability of individual  $i_d$  being heterozygotic and in IBS at the allele in individual  $j_h$  at  
110 a site can be calculated with:

$$\Pr(Aa, a \text{ or } Aa, A) = \Pr(Aa) = 2pq.$$

111  
112  
113 (3)

114 Because  $i_d$  and  $j_h$  share either 0 or 1 allele by descent ( $j_h$  being haploid),

$$\pi_{0i_dj_h} + \pi_{1i_dj_h} = 1.$$

115  
116  
117 (4)

118 With equation (1), we derive

$$\phi_{i_dj_h} = (1/2)(1 - \pi_{0i_dj_h}).$$

119  
120  
121 (5)

122 We can combine equation (5) with equation (3) to get

$$\phi_{i_dj_h} = \frac{1}{2} - \frac{\Pr(AA, a \text{ or } aa, A)}{2pq}.$$

123  
124

125 (6)

126 Because only individual  $i_d$  is heterozygotic, the expected genome-wide heterozygosity,  
127  $\sum_m 2p_m q_m$ , can be estimated with  $N_{Aa}^{(i_d)} / M_{i_d j_h}$  (Manichaikul *et al.*, 2010), where  $N_{Aa}^{(i_d)}$  is the  
128 number of heterozygotic sites in individual  $i_d$  and  $M_{i_d j_h}$  is the number of sites with non-missing  
129 data in both  $i_d$  and  $j_h$ .  $\sum_m \Pr(AA, a \text{ or } aa, A)_m$  can be estimated with  $N_{AA, a \text{ or } aa, A} / M_{i_d j_h}$ , where  
130  $N_{AA, a \text{ or } aa, A}$  is the number of sites where individual  $i$  is homozygotic but not in IBS with  
131 individual  $j_h$ . Therefore, kinship between individuals  $i_d$  and  $j_h$  can be estimated with:

132

$$\widehat{\Phi}_{i_d j_h} = \frac{1}{2} - \frac{N_{AA, a \text{ or } aa, A}}{N_{Aa}^{(i_d)}},$$

133

134 (7)

135 which constitute our exKING-robust estimator for a haploid-diploid pair.

136

137 Methods for using related individuals to estimate  $pq$

138 The KING-robust extension, including KING-robust (Manichaikul *et al.*, 2010) for

139 diploid pairs and exKING-robust for haploid-diploid pairs (7), relies on  $N_{Aa}^{(i_d)}$  (and  $N_{Aa}^{(j_d)}$ ).

140 However, in haploid pairs, we do not have the luxury of using the heterozygosity of individuals

141 of interest, so we develop a different estimator, KINGENS, which uses “heterozygosity

142 references” to estimate  $pq$ . The accuracy of  $\widehat{\Phi}_{i_h j_h}$  highly depends on the choice of references. To

143 accurately capture heterozygosity, references should come from the same subpopulation as

144 individuals  $i_h$  and  $j_h$ . Identification of appropriate references can be done by examining kinship

145 estimates between the individual  $i_h$  and  $j_h$  and the potential references. Since some individuals

146 may deviate from Hardy-Weinberg equilibrium (HWE) in subpopulations, choosing a single

147 reference from the relatives of either individual  $i_h$  or  $j_h$  may result in using an inbred or admixed  
 148 product, biasing the estimate. So, we choose two sets of individuals  $K(i_h, t)$  and  $K(j_h, t)$ , which are  
 149 related to either one of the two individuals of interest, given a kinship threshold  $t$ . Every  
 150 individual  $k$  in  $K(i_h, t)$  or  $K(j_h, t)$  is used as a heterozygosity reference for an intermediate kinship  
 151 estimate,  $\hat{\phi}_{i_h j_h}^{[k]}$ . Then, we calculate two medians of intermediate kinship estimates, one from  
 152  $K(i_h, t)$  and one from  $K(j_h, t)$ . Finally, we take the mean of these two medians as our final estimate  
 153  $\hat{\phi}_{i_h j_h}$ . We explain this estimation procedure below in detail.

154 For more generality, we introduce this procedure for diploid individuals to modify the  
 155 exKING-robust estimators as well. For two diploids  $i_d$  and  $j_d$  and for a reference individual  $k$ , we  
 156 define the intermediate kinship estimate  $\hat{\phi}_{i_d j_d}$  as

$$158 \quad \hat{\phi}_{i_d j_d}^{[k]} = \frac{1}{2} - \frac{1}{4} \frac{4N_{AA,aa \text{ or } aa,AA}^{(i_d, j_d)} - 2N_{Aa, Aa}^{(i_d, j_d)} + N_{Aa}^{(i_d)} + N_{Aa}^{(j_d)}}{N_{Aa}^{(k)}}.$$

159 (8)

160 Next, for an individual  $x$ , we consider its references to be the set  $K(x, t)$  of diploid individuals that  
 161 share kinship with  $x$  greater than a given threshold  $t$  (including  $x$  itself if  $x$  is diploid), based on  
 162 the exKING-robust kinship estimate. Finally, we define the KIMGENS estimate as follows:

$$164 \quad \hat{\phi}_{i_d j_d} = \frac{1}{2} \left( \text{Median}_{k \in K(i_d, t)} \{ \hat{\phi}_{i_d j_d}^{[k]} \} + \text{Median}_{l \in K(j_d, t)} \{ \hat{\phi}_{i_d j_d}^{[l]} \} \right).$$

165 (9)

166 Parenthesized superscripts denote the individuals with which sequences are compared to derive  
 167 the number of sites with a particular pattern, and bracketed superscripts denote the individuals  
 168 used for intermediate kinship estimates. Note, (8) corresponds to equation (11) in Manichaikul *et*



169 *al.*, (2010) for  $k$  taken to be either  $i_d$  or  $j_d$ , whichever has the smallest  $N_{Aa}^{(k)}$ . The innovation here  
 170 is to consider the median of kinship estimates, and to use close relatives (not just  $i_d$  or  $j_d$ ) to  
 171 approximate heterozygosity at the denominator.

172 Using the same idea, we use (7) to define the intermediate kinship estimate between a  
 173 pair of diploid and haploid individuals, given a reference individual  $k$  as:

174

$$\hat{\phi}_{i_d j_h}^{[k]} = \frac{1}{2} - \frac{N_{AA,a \text{ or } aa,A}^{(i_d, j_h)}}{N_{Aa}^{(k)}} \quad (10)$$

177 and for a haploid-diploid pair we define the KIMGENS estimate as:

$$\hat{\phi}_{i_d j_h} = \frac{1}{2} \left( \text{Median}_{k \in K(i_d, t)} \{ \hat{\phi}_{i_d j_h}^{[k]} \} + \text{Median}_{l \in K(j_h, t)} \{ \hat{\phi}_{i_d j_h}^{[l]} \} \right). \quad (11)$$

180

181 When calculating a  $\hat{\phi}_{i_d j_d}^{[k]}$  (or  $\hat{\phi}_{i_d j_h}^{[k]}$ ), there are three individuals involved:  $i_d, j_d$  (or  $j_h$ ) and  
 182  $k$ . The amount of missing data are not the same in these three individuals. So, we only consider  
 183 the sites that are non-missing in all three individuals for each  $\hat{\phi}_{i_d j_d}^{[k]}$  (or  $\hat{\phi}_{i_d j_h}^{[k]}$ ).

184

## 185 Kinship estimation in haploid pairs of individuals

186 Under the same definition for kinship, in haploid pairs, the kinship coefficient  $\phi_{i_h j_h}$  can  
 187 be calculated with:

188

$$189 \quad \phi_{i_h j_h} = \pi_{1i_h j_h}.$$

190 (12)

191 The probability of individuals  $i_h$  and  $j_h$  not in IBS at a site can be calculated with:

192

$$\Pr(A, a \text{ or } a, A) = 2pq\pi_{0i_hj_h}. \quad (13)$$

195 Because

$$\pi_{0i_hj_h} + \pi_{1i_hj_h} = 1,$$

197

$$\phi_{i_hj_h} = 1 - \frac{\Pr(A, a \text{ or } a, A)}{2pq}. \quad (14)$$

200 Using the same strategy described above, an intermediate kinship for haploid pairs of  
201 individuals can be estimated using a reference diploid individual  $k$  with:

202

$$\hat{\phi}_{i_hj_h}^{[k]} = 1 - \frac{N_{A,a \text{ or } a,A}^{(i_hj_h)}}{N_{Aa}^{(k)}} \quad (15)$$

205 and the KIMGENS estimate for a haploid-haploid pair is defined as

206

$$\hat{\phi}_{i_hj_h} = \frac{1}{2} \left( \text{Median}_{k \in K(i_h,t)} \{ \hat{\phi}_{i_hj_h}^{[k]} \} + \text{Median}_{l \in K(j_h,t)} \{ \hat{\phi}_{i_hj_h}^{[l]} \} \right). \quad (16)$$

208

210 Simulations

211 To assess the performance of these estimators, we simulated panmictic, structured and  
212 admixed populations of species with haplodiploid or diploid genetic system. For panmictic  
213 populations, the allele frequency of each site was simulated from a uniform distribution between  
214 0.1 and 0.9,  $U(0.1,0.9)$ . The genotypes for starter individuals (those without known parents) in  
215 pedigree simulations were drawn from the allele frequency. For structured and admixture  
216 populations, the allele frequencies of three subpopulations were simulated following the Balding-  
217 Nichols model from a panmictic ancestral population (allele frequency drawn from  $U(0.1,0.9)$ ).  
218 The Wright's  $F_{st} (\theta_k)$  of the subpopulations was set to 0.05, 0.15 and 0.25. In structured  
219 populations, each family was drawn from a random subpopulation. To simulate admixture,  
220 Conomos's strategy was used (Conomos *et al.*, 2016). In pedigree simulations, the ancestry  
221 proportions of the founders were drawn independently from either of two Dirichlet distributions:  
222  $Dir(6, 2, 0.3)$  and  $Dir(2, 6, 0.3)$ , and the genotypes of the founders were drawn from the ancestry  
223 and allele frequencies of the three subpopulations.

224 While simulating pedigrees, nine different scenarios were simulated 1000 times each.  
225 The scenarios differed by four factors: (1) the number of independent SNP sites: 20k or 100k, (2)  
226 genetic system: arrhenotokous haplodiploidy or diploidy, (3) population structure: panmictic,  
227 structured or admixture and (4) pedigrees (Supplementary Table 1). Overall, 100k SNP sites  
228 were simulated unless when the estimators being compared included those implemented in  
229 PolyRelatedness, in which case 20k SNPs were simulated. All simulations are under  
230 haplodiploidy unless otherwise noted. First, to evaluate the performance of exKING-robust and  
231 KIMGENS, we simulated a single large family (Supplementary Figure 1) from a panmictic  
232 population (scenario 1). To compare the performance with that of previously published  
233 estimators, we simulated 11 families (Supplementary Figure 2) from a panmictic or structured

234 population (scenarios 2 and 3). To explore the performance of the estimators under admixture,  
235 we simulated the single large family (Supplementary Figure 1) or 11 families (Supplementary  
236 Figure 2) from an admixed population with 100k or 20k sites (scenarios 4 and 5). To understand  
237 how different estimators perform on inbred products, we simulated five inbreeding families  
238 (Supplementary Figure 3) and ten unrelated individuals (so PolyRelatedness can estimate allele  
239 frequency more accurately) from a panmictic diploid or haplodiploid population (scenarios 6 and  
240 7). Lastly, to explore the use of different thresholds ( $t$ ), we simulated a new family  
241 (Supplementary Figure 4) with twenty unrelated diploid individuals in a structured or admixed  
242 population (scenarios 8 and 9).

243 We estimated pairwise kinships for all individuals using different estimators and  
244 extracted the estimates of the pairs of interest. To convert relatedness (calculated by the  
245 estimators implemented in PolyRelatedness) to kinship, the relatedness estimates for diploid  
246 pairs were divided by two and those for haploid-haploid and haploid-diploid pairs were divided  
247 by one. To summarize the estimation, we calculated the bias ( $\sum(\hat{\phi}_i - \phi_{true})/n$ ) and root-mean-  
248 square error (RMSE;  $\sqrt{\sum(\hat{\phi}_i - \phi_{true})^2/n}$ ) of each estimator. For KIMGENS, the threshold  $t$   
249 was arbitrarily set to 0.1, except when exploring different thresholds, in which case  $t$  was set to  
250 either 0.1 or 0. Inbreeding coefficients were calculated from pedigrees with the R package  
251 kinship2 (Sinnwell *et al.*, 2014).

252

## 253 Biological data

254 In addition to simulations, we used a honeybee dataset which was originally collected for  
255 estimating crossover rate (Liu *et al.*, 2015). This dataset includes three monogynous colonies  
256 (one queen per colony). One queen (diploid) and multiple drones (haploids) were sampled from

257 all three colonies. Six additional workers (diploids) were sampled from one of the colonies. Also,  
258 three drones were sequenced twice. We therefore expect that from a single colony, (1) the drones  
259 and the queen share a kinship of 0.5, (2) the workers and the queen share a kinship of 0.25, (3)  
260 the drones share a kinship of 0.5 with each other, (3) the workers share a kinship of 0.375 (full-  
261 siblings) or 0.125 (half-siblings) with each other, (4) the drones and workers share a kinship of  
262 0.25, and (5) the two sequences from the same drone share a kinship of 1 with each other.

263 The genomic raw reads were downloaded from NCBI and mapped to reference genome  
264 (GCF\_000002195.4) with BWA mem ver. 0.7.17. Duplicated reads were filtered with samtools  
265 ver. 1.9 and SNPs were called with bcftools ver. 1.9. To avoid identifying SNPs due to indels,  
266 we applied four filters: (1) the repetitive regions identified by RepeatMasker, (2) sites with read  
267 depth higher than 1.3X mean depth or lower than 0.75X mean depth, (3) sites with minor allele  
268 frequency lower than 0.01 and (4) sites that are called heterozygous in any haploid individuals  
269 (drones). All filtered SNPs (N=1,008,683) were used to estimate kinship without LD correction.  
270 As the previous section, for KIMGENS, the threshold  $t$  was arbitrarily set to 0.1. To compare  
271 KIMGENS with other published estimators, we sampled one every twenty SNPs to avoid  
272 segmentation faults for these other estimators.

273

## 274 Results and discussion

### 275 Evaluation of the methods under a panmictic population

276 We simulated a single large family in haplodiploidy with 100k sites in a panmictic  
277 population (Supplementary Table 1 and Supplementary Figure 1) and compared the performance  
278 of exKING-robust and KIMGENS, for each ploidy level of the individuals of interests (diploid,  
279 haploid-diploid or haploid). For diploid pairs of individuals, the estimates from both exKING-

280 robust and KIMGENS are accurate with no bias and small RMSE (Figure 1, Supplementary  
281 Table 2). The same is observed for haploid-diploid and haploid pairs (Figure 1, Supplementary  
282 Table 2). The variance of estimates is usually higher in haploid pairs and lower in diploid pairs,  
283 likely due to the fact that the amount of allelic data is halved in haploid compared to diploid  
284 individuals, causing a precision decrease.

285

## 286 Comparison with previous methods in panmictic and structured populations

287 We compared the performance of KIMGENS with other relatedness estimators  
288 implemented in the package PolyRelatedness, including Huang2014 (MOM), Huang2015  
289 (MLE), Ritland1996 and Loiselle1995 (Huang *et al.*, 2015; Loiselle *et al.*, 1995; Ritland, 1996).  
290 We simulated 11 families from a panmictic or structured population (Supplementary Table 1 and  
291 Supplementary Figure 2).

292 In a panmictic population, the performance of KIMGENS outcompetes all other  
293 estimators in terms of the overall RMSE and bias (Figure 2A, Supplementary Table 3).  
294 KIMGENS performs slightly worse than Huang2015 only when the true kinship is zero. In a  
295 structured population, KIMGENS again outperforms all other methods when the true kinship is  
296 not zero (Figure 2B and Supplementary Table 4). However, KIMGENS has the highest RMSE  
297 and absolute bias when true kinship is zero, and Huang2015 has the lowest. In the structured  
298 population simulation, there is 1/3 chance that two unrelated individuals are from different  
299 subpopulations. The fixed variants in the subpopulations increase the homozygotic differences  
300 between two individuals and hence lower the kinship estimates between unrelated samples using  
301 KING-robust-based strategies (Manichaikul *et al.*, 2010). Also, note that Huang2015 performs  
302 the best when the true kinship equals zero in both conditions (Supplementary Table 4). This is

303 likely because Huang2015 uses a maximum likelihood strategy searching for IBD on a parameter  
304 space, where the lower bound of the parameter space is zero (Huang *et al.*, 2015). If negative  
305 kinship is a concern, one can enforce a lower bound of zero for all estimators. In our simulations,  
306 this would vastly improve the bias and RMSE of KIMGENS when the true kinship is zero,  
307 without affecting the performance when the true kinship is positive.

308

### 309 Estimates in an admixed population

310         Although estimating kinship in an admixed population is not the goal of this project, we  
311 explored the robustness of KIMGENS in admixed population. First, we simulated the single-  
312 family pedigree in an admixed population to evaluate the performance of exKING-robust and  
313 KIMGENS (Supplementary Table 1 and Supplementary Figure 1). Like previous reports on  
314 KING-robust (Conomos *et al.*, 2016), the accuracy of both estimators drops compared to the  
315 estimates in a panmictic population because the individuals from a single family may have  
316 different ancestries (Supplementary Table 5 and Supplementary Figure 5). Similarly to the  
317 panmictic population simulation, the estimates in haploid and diploid pairs of individuals have  
318 slightly higher and lower RMSE, respectively. KIMGENS also performs slightly better than  
319 exKING-robust in terms of RMSE and bias.

320         We further compared KIMGENS with aforementioned estimators using the 11-family-  
321 pedigree (Supplementary Table 1 and Supplementary Figure 2). In this admixture simulation,  
322 KIMGENS has lower absolute bias than all other estimators but a RMSE slightly higher than  
323 Huang 2015 (Figure 2C and Supplementary Table 6). The relatively high RMSE is also driven  
324 by the lower kinship estimates on unrelated individuals due to the same reasons discussed in the  
325 last section.

326

## 327 Estimates on inbred individuals

328 Like KING-robust, KIMGENS is not designed to calculate kinship in inbred populations,  
329 but we explored its performance for inbred individuals by simulating five families and ten  
330 additional unrelated individuals (half male and half female) in a panmictic population in diploid  
331 or haplodiploid genetic system (Supplementary Table 1 and Supplementary Figure 3). The  
332 unrelated individuals were included because all of the methods being compared require  
333 population allele frequency, which is estimated with the sampled individuals in this study. In a  
334 diploid genetic system, KIMGENS performs slightly better than other estimators overall in terms  
335 of both RMSE and bias (Figure 3A and Supplementary Table 7). However, the RMSE and  
336 absolute bias increase when the individual inbreeding coefficients of the two individuals  
337 increase, and the increasing rate is faster than other kinship estimators, such as Huang2015 and  
338 Loiselle1995.

339 In a haplodiploid genetic system, KIMGENS has a relatively high overall RMSE and  
340 absolute bias (Figure 3B and Supplementary Table 8), so we broke down the results by the  
341 ploidy of pairs and individual inbreeding coefficients. For diploid pairs, the behavior of  
342 KIMGENS is very similar to that in the diploid simulation (Supplementary Table 8 and  
343 Supplementary Figure 6A). KIMGENS outperforms all other estimators overall, but the accuracy  
344 drops when the individual inbreeding coefficient increases. For haploid pairs, all individuals  
345 have zero inbreeding coefficients and KIMGENS also performs better than other estimators  
346 (Supplementary Table 8 and Supplementary Figure 6C). However, for haploid-diploid pairs,  
347 KIMGENS performs worse than other estimators overall except for exKING-robust and also  
348 when individual inbreeding coefficients are higher than zero (Supplementary Table 8 and



349 Supplementary Figure 6B). Like diploid pairs, the kinship estimates decrease under a higher  
350 degree of inbreeding (Supplementary Table 8 and Supplementary Figure 6B). This correlation is  
351 essentially the same underestimation as when the individuals in the pair of interest are from two  
352 different subpopulations.

353

#### 354 Performance on biological data

355 The kinship estimates on the honeybee dataset using KIMGENS are close to expectations  
356 in all within-colony relationships except for workers-workers (Figure 4; Supplementary Table 9).  
357 Kinship estimates between workers can be clustered into three groups: 0.125, 0.25 and 0.375.  
358 While estimates at 0.125 and 0.375 between workers are expected for full-siblings and half-  
359 siblings, estimates at 0.25 are unexpected, but is likely the result of paternal relatedness. For  
360 example, the kinship between two workers whose fathers are siblings equals 0.25. In addition,  
361 we found that individuals between different colonies share a considerably high degree of kinship  
362 (mean= 0.08) (Figure 4). We hypothesize that the high degree of kinship is derived from true  
363 background relatedness due to breeding management of the bee farm. The background  
364 relatedness may also contribute to the positive biases of kinship estimates between workers  
365 within a single family—that is, the putative half-siblings may have distantly related fathers  
366 (Supplementary Table 9).

367 The performance of KIMGENS on the subsampled dataset is similar to that on the whole  
368 dataset, while all other estimators underestimate kinships on the subsampled dataset when the  
369 true kinships are lower than 1 (Supplementary Figure 7 and Supplementary Table 10). This  
370 observation supports the usage of KIMGENS on biological datasets.

371

## 372 Choice of the kinship threshold $t$

373           The only parameter in KIMGENS is the kinship threshold  $t$  used to define the set of  
374 relatives for heterozygosity referencing. Without inbreeding in a panmictic or structured  
375 population, the threshold  $t$  should not affect the accuracy as long as it is positive. However,  
376 admixture may elevate unrelated individuals kinship (Figure 2C), and inbreeding can lower the  
377 heterozygosity in some individuals, so the choice of  $t$  needs to be taken into consideration.

378           The threshold  $t$  can affect two factors: the accuracy of heterozygosity referencing and the  
379 number of reference individuals. In order to identify diploid individuals that can represent the  
380 heterozygosity of the individuals of interest (in a same population), one should consider a higher  
381  $t$ , but a higher  $t$  may reduce the number of heterozygosity references. A lower number of  
382 references should not directly affect the accuracy of kinship estimation. For example, although  
383 there are 46 drones in the honeybee dataset and only nine females, the female honeybees are  
384 closely related to the drones and hence can represent the heterozygosity of the drones well.  
385 However, if a dataset includes numerous inbreeding events, using a high  $t$  may result in only  
386 referencing the inbred individuals, and the kinship estimation will be inaccurate, so a lower  $t$   
387 should be considered. In some extreme cases, it may be that KIMGENS cannot estimate kinship,  
388 if zero diploid relatives are available for a pair of haploid individuals. In this case, one may  
389 choose zero for threshold  $t$ , which allows referencing unrelated individuals from the same  
390 subpopulation for heterozygosity.

391           To explore the effect of using unrelated individuals as heterozygosity references on  
392 kinship estimation for haploid pairs of individuals, we simulated one family and twenty unrelated  
393 diploids in a structured or admixed population (Supplementary Table 1 and Supplementary  
394 Figure 4). We first estimated kinships regularly using a threshold  $t$  at 0.1 with KIMGENS. Then,

395 we removed all diploid individuals within the family, leaving the unrelated diploids in the dataset  
396 only and estimated kinship using a threshold  $t$  at 0. In a structured population, both the RMSE  
397 and absolute bias are higher when using non-relatives compared to using relatives, but the  
398 estimates are still accurate (Supplementary Table 11 and Supplementary Figure 8A). In admixed  
399 populations, the RMSE and bias are also higher when using non-relatives; however, the RMSE is  
400 noticeably higher when the true kinship is over zero (Supplementary Table 11 and  
401 Supplementary Figure 8B). This is likely due to the complex ancestry of the individuals in  
402 admixed populations, resulting in non-relatives providing a significantly worse heterozygosity  
403 reference than relatives. Of note, in 1% of the pairs of interest, there were no diploid individuals  
404 with a kinship above 0 (but less than 0.1) with either haploid individual in the pair, so no kinship  
405 was estimated for these pairs. Using a negative threshold  $t$  can resolve the issue, but these  
406 estimates should be interpreted with extra caution.

407

## 408 Conclusions

409 Here we present new kinship estimators for mixed haploid-diploid populations that are  
410 robust to population structure. We demonstrate the accuracy of KIMGENS in panmictic,  
411 structured and admixed simulated populations as well as in a biological dataset. Simulations and  
412 biological datasets indicate that KIMGENS performs better than previously developed kinship  
413 estimators, but one may choose to use previously developed kinship estimators when the dataset  
414 contains many multiallelic loci or individuals of interest with high degree of inbreeding  
415 coefficient. The methods are implemented in an R package available on github  
416 (<https://github.com/YenWenWang/HapDipKinship>) for researchers studying population  
417 genomics in mixed ploidy systems.

418

## 419 Data Availability Statement

420 The data underlying this article are available in Open Science Repository at  
421 <https://dx.doi.org/10.17605/OSF.IO/EP6MF>. The datasets were derived from NCBI sequence  
422 read archive, accession SRP043350.

423

## 424 Acknowledgements

425 The authors thank Dr. Anne Pringle and Dr. Jacob Golan for reviewing the manuscript,  
426 and Dr. Cameron Currie and Dr. Sean Schoville for advice on biological datasets.

## 427 Funding

428 Y.-W.W supported by an E. K. and O. N. Allen fellowship, a Tulipa et Paeonia RA  
429 support and a Taylor-Vinje research award provided by the department of Botany, and a MSA  
430 graduate fellowship provided by the Mycological Society of America. C.A was supported in part  
431 by a H. I. Romnes faculty fellowship provided by the University of Wisconsin-Madison Office  
432 of the Vice Chancellor for Research and Graduate Education with funding from the Wisconsin  
433 Alumni Research Foundation.

434

## 435 References

- 436 Brown,A.J. and Casselton,L.A. (2001) Mating in mushrooms: Increasing the chances but  
437 prolonging the affair. *Trends Genet.*, **17**, 393–400.
- 438 Conomos,M.P. *et al.* (2016) Model-free estimation of recent genetic relatedness. *Am. J. Hum.*  
439 *Genet.*, **98**, 127–148.
- 440 Cruickshank,R.H. and Thomas,R.H. (1999) Evolution of haplodiploidy in dermanyssine mites  
441 (Acari: Mesostigmata). *Evolution (N. Y.)*, **53**, 1796–1803.
- 442 Hahn,M. (2019) Experimental design. In, *Molecular population genetics*. Sinauer Associates,  
443 Inc., Sunderland, Massachusetts, pp. 25–42.
- 444 Huang,K. *et al.* (2015) Estimating pairwise relatedness between individuals with different levels  
445 of ploidy. *Mol. Ecol. Resour.*, **15**, 772–784.
- 446 John,D.M. (1994) Alternation of generations in algae: Its complexity, maintenance and  
447 evolution. *Biol. Rev. Camb. Philos. Soc.*, **69**, 275–291.
- 448 Lange,K. (1997) Mathematical and statistical methods for genetic analysis. Springer, New York,  
449 NY, USA.
- 450 Liu,H. *et al.* (2015) Causes and consequences of crossing-over evidenced via a high-resolution  
451 recombinational landscape of the honey bee. *Genome Biol.*, **16**, 15.
- 452 Loiselle,B.A. *et al.* (1995) Spatial genetic structure of a tropical understory shrub, *Psychotria*  
453 *officinalis* (Rubiaceae). *Am. J. Bot.*, **82**, 1420–1425.
- 454 Malécot,G. (1948) Les mathématiques de l’hérédité. Masson et Cie, Paris, France.
- 455 Manichaikul,A. *et al.* (2010) Robust relationship inference in genome-wide association studies.  
456 *Bioinformatics*, **26**, 2867–2873.
- 457 Normark,B.B. (2003) The evolution of alternative genetic systems in insects. *Annu. Rev.*

- 458        *Entomol.*, **8**, 397–423.
- 459    Otto,S.P. and Gerstein,A.C. (2008) The evolution of haploidy and diploidy. *Curr. Biol.*, **18**,
- 460        R1121–R1124.
- 461    Ramstetter,M.D. *et al.* (2017) Benchmarking relatedness inference methods with genome-wide
- 462        data from thousands of relatives. *Genetics*, **207**, 75–82.
- 463    Ritland,K. (1996) Estimators for pairwise relatedness and individual inbreeding coefficients.
- 464        *Genet. Res.*, **67**, 175–185.
- 465    Sinnwell,J.P. *et al.* (2014) The kinship2 R package for pedigree data. *Hum. Hered.*, **78**, 91–93.
- 466

## 467 Figures

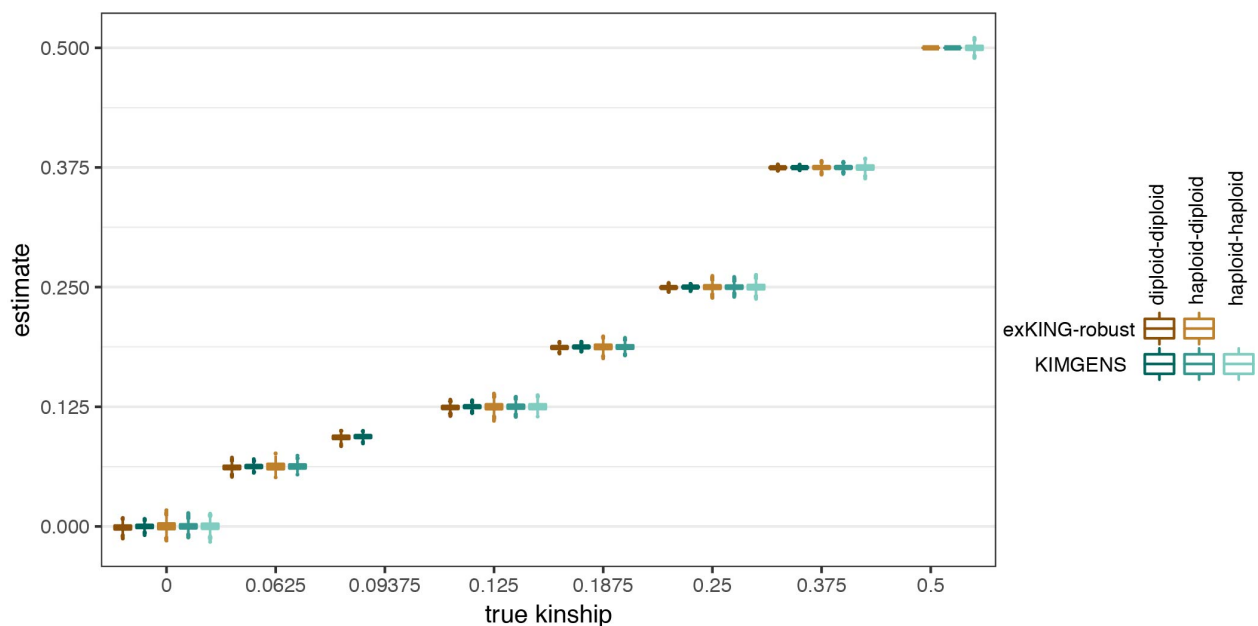

468

469 Figure 1. Distribution of kinship estimates of exKING-robust and KIMGENS in a panmictic

470 population. Boxplots show the median, first and third quartiles, and range of each distribution.

471

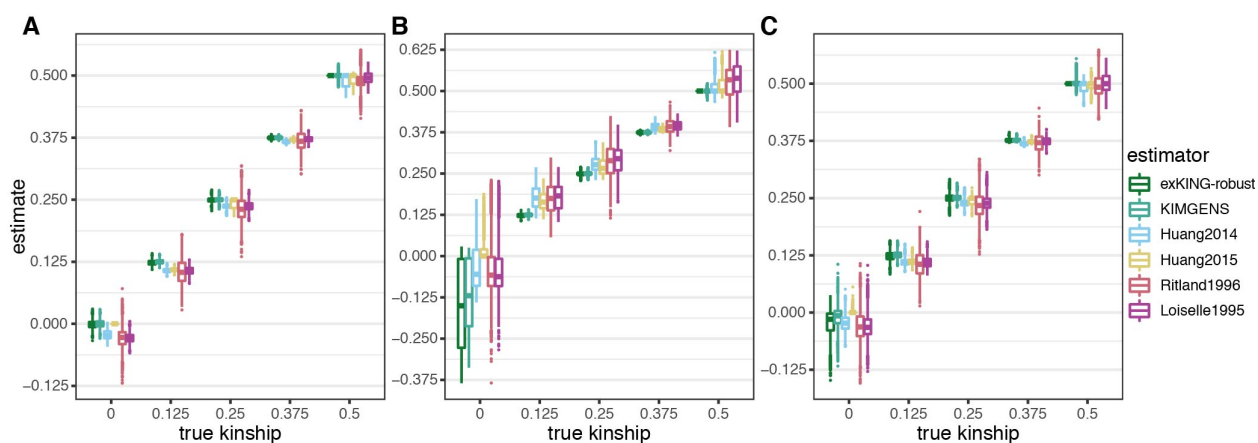

472

473 Figure 2. Kinship estimates of different estimators in panmictic (A), structured (B) and admixed

474 (C) populations.

475

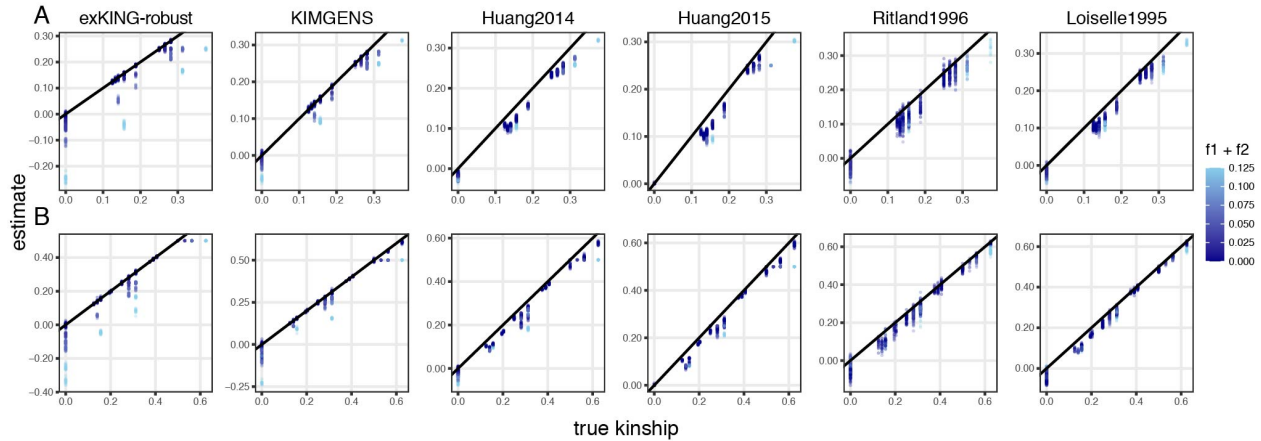

476

477 Figure 3. Performance of different estimators on inbred diploid (A) and haplodiploid (B)

478 populations. A thousand points were chosen randomly to be presented on each plots. Diagonal

479 line: estimated kinship = true kinship.  $f_1 + f_2$ : the sum of inbreeding coefficients of the two

480 individuals in a pair of interest.

481

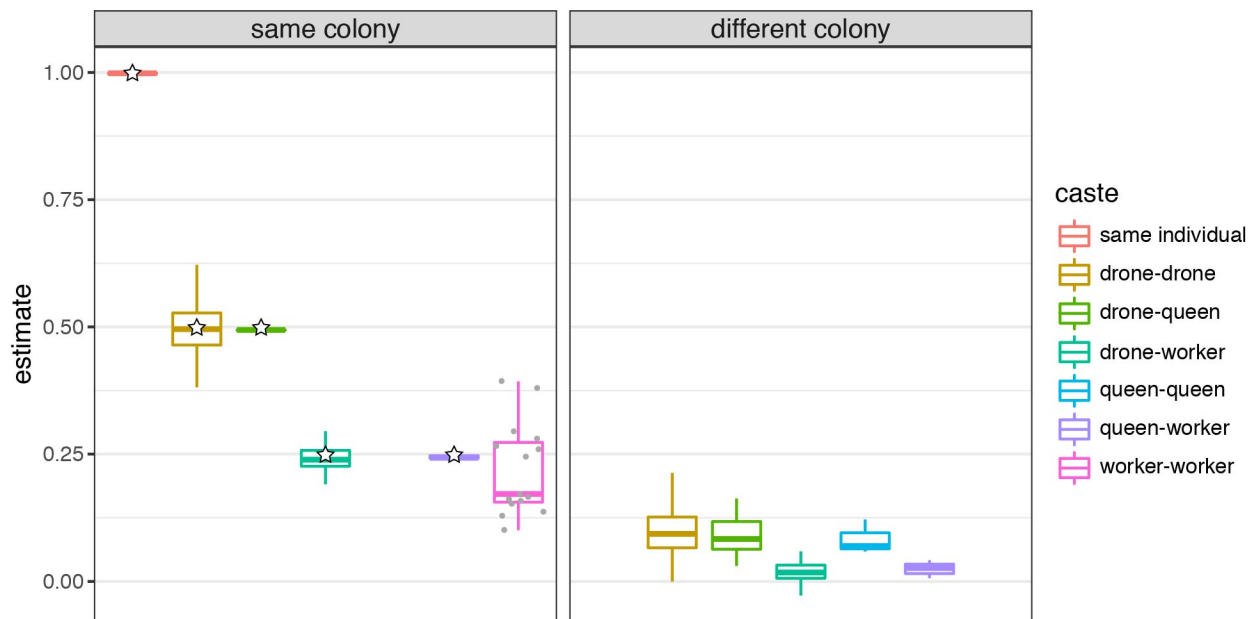

482

483 Figure 4. Kinship estimates from KIMGENS on three honeybee colonies. Gray dots indicate

484 each kinship estimate between workers. The “same individual” category consists of pairs of

485 sequence data sets from the drones that were sequenced twice. Stars indicate expected kinship.
